# Supplementary material for: Uniformly dispersed silicon nanoparticle/carbon nanosphere composites as highly stable lithium-ion battery electrodes
Source: Royal Society of Chemistry journal article supplement (doi:10.1039/c4ra14823a), 2015-01-01
Supplement: c4ra14823a1.pdf [file c4ra14823a1.pdf]

Electronic Supplementary Material (ESI)

**Uniformly Dispersed Silicon Nanoparticles/Carbon  
Nanospheres Composites as Highly Stable Lithium-ion Battery  
Electrodes**

Whon-hee Lee,<sup>a</sup> Da-Young Kang,<sup>a</sup> Jung Sub Kim,<sup>b</sup>

Joong Kee Lee<sup>b</sup> and Jun Hyuk Moon<sup>\*,a</sup>

*<sup>a</sup>Department of Chemical and Biomolecular Engineering, Sogang University,  
Seoul, Korea*

*<sup>b</sup>Energy Storage Research Center, Korea Institute of Science and Technology,  
Seoul, Korea*

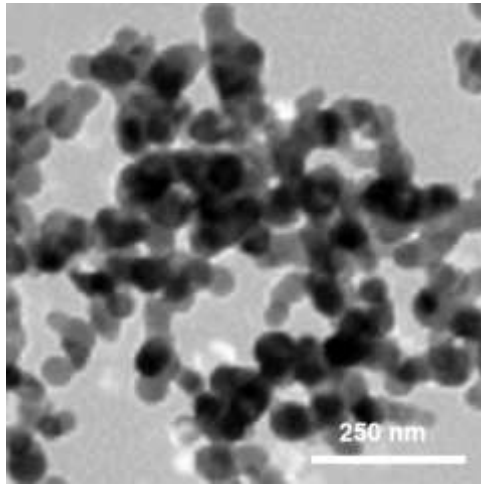

**Fig. S1** TEM image of SNPs

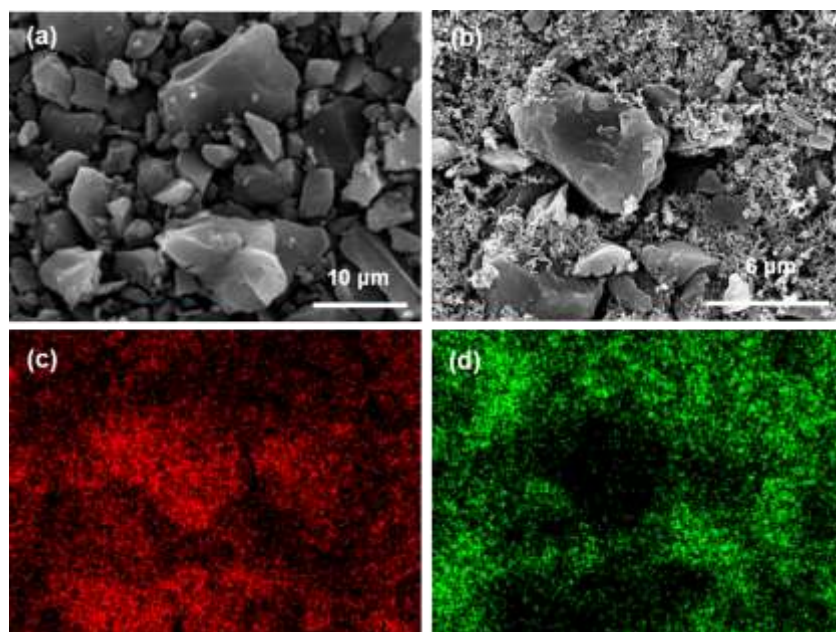

**Fig. S2** SEM images of (a) ACP, (b) SNP/ACP composite and (c, d) EDS mapping of C and Si, respectively.

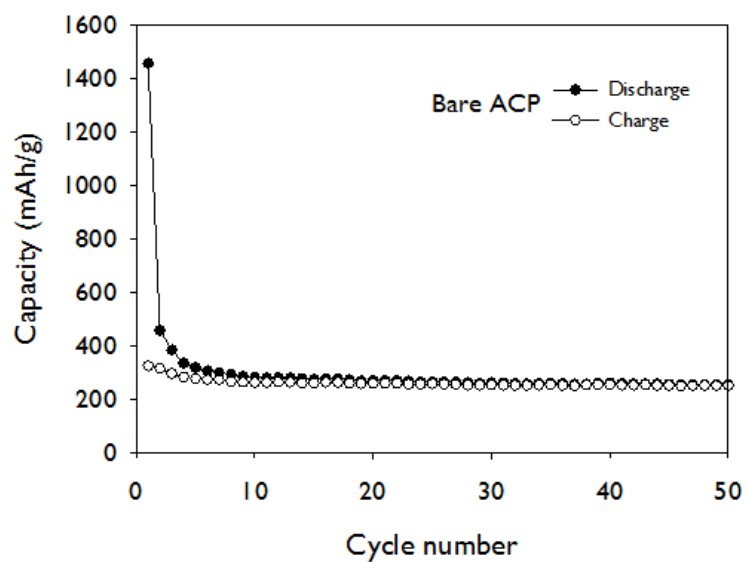

**Fig. S3** Specific capacity over charge/discharge cycle of the ACP electrode. The irreversible capacity of ACP was 1133 mAh/g. Compared to the irreversible capacity of CNS electrode (348 mAh/g), this value was several times larger. Thus this large irreversible capacity of ACP was attributed to its high specific area.
